# Supplementary material
Source: PubMed Central journal article supplement (PMC4289413)
Supplement: NIHMS616437-supplement-supplement_1.pdf [file NIHMS616437-supplement-supplement_1.pdf]

## SUPPLEMENTARY TABLE 1

**Cell culture media.** Details of the cell culture media used for growth of ovarian cancer cell lines and normal ovarian cells. FBS, foetal bovine serum.

| <b>Cell Line</b>                                          | <b>Culture Media</b>                                                                                                                                 |
|-----------------------------------------------------------|------------------------------------------------------------------------------------------------------------------------------------------------------|
| Mesenchymal stem cells (MSCs)                             | Alpha MEM (Lonza), L-glutamine (Lonza), 16.5% Premium Select FBS (Atlanta Biologicals).                                                              |
| TERT immortalized normal ovarian fibroblasts (INOFs)      | MCDB105:Medium 199 (1:1, both Sigma), L-glutamine, 15% Hyclone FBS (Pierce)                                                                          |
| TERT immortalized normal ovarian epithelial cells (OSECs) | INOF medium + 10ng/ml epidermal growth factor, 34µg/ml bovine pituitary extract (Life Technologies), 500ng/ml hydrocortisone, 5µg/ml insulin (Sigma) |
| Hey.A8                                                    | RPMI, L-glutamine, 10% FBS (PAA Laboratories)                                                                                                        |
| OVCA429                                                   | EMEM, L-glutamine, 1X non-essential amino acids, 1X sodium pyruvate (both Lonza), 10% FBS (PAA Laboratories)                                         |
| 1847                                                      | RPMI, L-glutamine, 10% FBS (PAA Laboratories)                                                                                                        |
| COV318                                                    | DMEM, L-glutamine, 10% FBS (PAA Laboratories)                                                                                                        |
| FUOV1                                                     | DMEM/F12, L-glutamine, 10% FBS (PAA Laboratories)                                                                                                    |
| OVCAR8                                                    | RPMI, L-glutamine, 10% FBS (PAA Laboratories)                                                                                                        |
| CaOV3                                                     | RPMI, L-glutamine, 10% FBS (PAA Laboratories)                                                                                                        |

## SUPPLEMENTARY TABLE 2

### Patient characteristics in the tissue microarray.

|                  | N (%)      |
|------------------|------------|
| <b>Age</b>       |            |
| <50              | 27 (18.6)  |
| >50              | 118 (81.4) |
| <b>Stage</b>     |            |
| Stage 1          | 34 (23.4)  |
| Stage 2          | 12 (8.3)   |
| Stage 3          | 95 (65.5)  |
| Stage 4          | 14 (9.7)   |
| <b>Grade</b>     |            |
| Grade 1          | 14 (9.7)   |
| Grade 2          | 44 (30.3)  |
| Grade 3          | 87 (60.0)  |
| <b>Histology</b> |            |
| Serous           | 98 (67.6)  |
| Clear Cell       | 24 (16.6)  |
| Endometrioid     | 12 (8.3)   |
| Mucinous         | 9 (6.2)    |
| Other            | 2 (1.4)    |

**SUPPLEMENTARY TABLE 3**

**Gene ontology (GO) analyses of gene differentially expressed in co-cultured stromal cells.** DAVID was used to test for enrichment of Biological Processes, Cellular Compartments and Molecular Function GO terms. Genes differentially expressed by EOC-co-cultured stromal cells were enriched for pathways involved in female pregnancy, and tended to be associated with the extracellular milieu. Statistically significant terms are shown (P<0.05, adjusted).

| Term                                            | Count | P Value    |           | Fold Enrichment |
|-------------------------------------------------|-------|------------|-----------|-----------------|
|                                                 |       | Unadjusted | Benjamini |                 |
| <b><i>BIOLOGICAL PROCESSES</i></b>              |       |            |           |                 |
| GO:0007155~cell adhesion                        | 62    | 1.36E-06   | 0.004     | 1.90            |
| GO:0022610~biological adhesion                  | 62    | 1.43E-06   | 0.002     | 1.90            |
| GO:0051270~regulation of cell motion            | 26    | 3.24E-06   | 0.003     | 2.90            |
| GO:0030198~extracellular matrix organization    | 18    | 5.48E-06   | 0.004     | 3.72            |
| GO:0040012~regulation of locomotion             | 25    | 9.44E-06   | 0.006     | 2.80            |
| GO:0030334~regulation of cell migration         | 23    | 1.15E-05   | 0.006     | 2.93            |
| GO:0007565~female pregnancy                     | 18    | 1.19E-05   | 0.005     | 3.52            |
| GO:0007229~integrin-mediated signaling pathway  | 14    | 1.69E-05   | 0.007     | 4.30            |
| GO:0043062~extracellular structure organization | 22    | 2.13E-05   | 0.007     | 2.90            |
| GO:0001568~blood vessel development             | 28    | 2.74E-05   | 0.008     | 2.46            |
| GO:0009611~response to wounding                 | 47    | 3.18E-05   | 0.009     | 1.91            |
| GO:0001944~vasculature development              | 28    | 4.21E-05   | 0.011     | 2.40            |
| GO:0042127~regulation of cell proliferation     | 62    | 5.17E-05   | 0.012     | 1.69            |
| GO:0010033~response to organic substance        | 58    | 5.36E-05   | 0.012     | 1.73            |
| GO:0030155~regulation of cell adhesion          | 19    | 6.28E-05   | 0.013     | 2.98            |
| GO:0035150~regulation of tube size              | 11    | 1.38E-04   | 0.026     | 4.46            |
| GO:0050880~regulation of blood vessel size      | 11    | 1.38E-04   | 0.026     | 4.46            |
| GO:0003013~circulatory system process           | 22    | 1.49E-04   | 0.027     | 2.54            |
| GO:0008015~blood circulation                    | 22    | 1.49E-04   | 0.027     | 2.54            |
| GO:0006928~cell motion                          | 41    | 1.95E-04   | 0.033     | 1.86            |
| <b><i>CELLULAR COMPARTMENT</i></b>              |       |            |           |                 |
| GO:0044421~extracellular region part            | 94    | 1.50E-11   | 2.11E-08  | 2.06            |
| GO:0005576~extracellular region                 | 156   | 1.05E-10   | 1.48E-07  | 1.63            |
| GO:0031012~extracellular matrix                 | 42    | 5.08E-08   | 7.15E-05  | 2.56            |

|                                                                                |     |          |          |       |
|--------------------------------------------------------------------------------|-----|----------|----------|-------|
| GO:0005578~proteinaceous extracellular matrix                                  | 38  | 4.64E-07 | 6.53E-04 | 2.50  |
| GO:0005615~extracellular space                                                 | 60  | 5.57E-06 | 0.008    | 1.84  |
| GO:0044420~extracellular matrix part                                           | 19  | 9.36E-06 | 0.013    | 3.42  |
| GO:0000267~cell fraction                                                       | 81  | 3.82E-05 | 0.054    | 1.57  |
| GO:0005794~Golgi apparatus                                                     | 67  | 9.48E-05 | 0.133    | 1.62  |
| GO:0005626~insoluble fraction                                                  | 65  | 9.88E-05 | 0.139    | 1.63  |
| GO:0005624~membrane fraction                                                   | 63  | 1.11E-04 | 0.155    | 1.64  |
| GO:0015629~actin cytoskeleton                                                  | 28  | 1.92E-04 | 0.270    | 2.19  |
| GO:0044459~plasma membrane part                                                | 139 | 2.11E-04 | 0.296    | 1.33  |
| GO:0031252~cell leading edge                                                   | 18  | 2.82E-04 | 0.395    | 2.75  |
| GO:0005604~basement membrane                                                   | 13  | 2.85E-04 | 0.400    | 3.51  |
| GO:0031226~intrinsic to plasma membrane                                        | 84  | 3.79E-04 | 0.532    | 1.46  |
| GO:0005887~integral to plasma membrane                                         | 82  | 4.71E-04 | 0.661    | 1.45  |
| GO:0005605~basal lamina                                                        | 6   | 9.06E-04 | 1.267    | 7.43  |
| GO:0009986~cell surface                                                        | 31  | 0.001    | 1.590    | 1.88  |
| GO:0005886~plasma membrane                                                     | 212 | 0.002    | 3.339    | 1.18  |
| GO:0005912~adherens junction                                                   | 17  | 0.003    | 3.871    | 2.31  |
| <b>MOLECULAR FUNCTION</b>                                                      |     |          |          |       |
| GO:0005178~integrin binding                                                    | 15  | 3.24E-07 | 2.81E-04 | 5.51  |
| GO:0005509~calcium ion binding                                                 | 73  | 5.24E-06 | 0.002    | 1.72  |
| GO:0008289~lipid binding                                                       | 42  | 2.32E-05 | 0.007    | 2.02  |
| GO:0008092~cytoskeletal protein binding                                        | 45  | 3.33E-05 | 0.007    | 1.94  |
| GO:0032403~protein complex binding                                             | 23  | 1.01E-04 | 0.017    | 2.54  |
| GO:0003779~actin binding                                                       | 30  | 5.36E-04 | 0.075    | 1.99  |
| GO:0005201~extracellular matrix structural constituent                         | 13  | 5.51E-04 | 0.066    | 3.28  |
| GO:0005520~insulin-like growth factor binding                                  | 7   | 7.78E-04 | 0.081    | 6.07  |
| GO:0019838~growth factor binding                                               | 14  | 0.001    | 0.096    | 2.89  |
| GO:0005543~phospholipid binding                                                | 19  | 0.001    | 0.111    | 2.33  |
| GO:0016717~oxidoreductase activity, acting on paired donors                    | 4   | 0.002    | 0.129    | 14.45 |
| GO:0050840~extracellular matrix binding                                        | 6   | 0.007    | 0.402    | 4.82  |
| GO:0008083~growth factor activity                                              | 16  | 0.007    | 0.392    | 2.15  |
| GO:0015082~di-, tri-valent inorganic cation transmembrane transporter activity | 7   | 0.008    | 0.404    | 3.89  |
| GO:0034185~apolipoprotein binding                                              | 4   | 0.009    | 0.413    | 8.67  |
| GO:0001871~pattern binding                                                     | 15  | 0.012    | 0.471    | 2.11  |
| GO:0030247~polysaccharide binding                                              | 15  | 0.012    | 0.471    | 2.11  |
| GO:0005539~glycosaminoglycan binding                                           | 14  | 0.013    | 0.475    | 2.17  |
| GO:0005507~copper ion binding                                                  | 9   | 0.014    | 0.484    | 2.83  |
| GO:0004065~arylsulfatase activity                                              | 4   | 0.016    | 0.514    | 7.22  |

**SUPPLEMENTARY TABLE 4**

**Gene ontology (GO) analyses of gene differentially expressed in co-cultured stromal cells.** DAVID was used to test for enrichment of KEGG pathway analysis terms. Statistically significant terms are shown (P<0.05, unadjusted).

| Term                                                            | Count | P Value    |           | Fold Enrichment |
|-----------------------------------------------------------------|-------|------------|-----------|-----------------|
|                                                                 |       | Unadjusted | Benjamini |                 |
| hsa04512:ECM-receptor interaction                               | 16    | 5.38E-05   | 0.009     | 3.37            |
| hsa05200:Pathways in cancer                                     | 33    | 0.001      | 0.105     | 1.78            |
| hsa04010:MAPK signaling pathway                                 | 28    | 0.002      | 0.099     | 1.86            |
| hsa04510:Focal adhesion                                         | 22    | 0.004      | 0.155     | 1.94            |
| hsa04115:p53 signaling pathway                                  | 11    | 0.004      | 0.132     | 2.87            |
| hsa05222:Small cell lung cancer                                 | 12    | 0.007      | 0.173     | 2.53            |
| hsa04640:Hematopoietic cell lineage                             | 12    | 0.008      | 0.176     | 2.47            |
| hsa05412:Arrhythmogenic right ventricular cardiomyopathy (ARVC) | 11    | 0.010      | 0.178     | 2.56            |
| hsa05416:Viral myocarditis                                      | 10    | 0.017      | 0.270     | 2.50            |
| hsa04270:Vascular smooth muscle contraction                     | 13    | 0.023      | 0.313     | 2.06            |
| hsa04810:Regulation of actin cytoskeleton                       | 20    | 0.032      | 0.386     | 1.65            |
| hsa05414:Dilated cardiomyopathy                                 | 11    | 0.033      | 0.366     | 2.12            |
| hsa05410:Hypertrophic cardiomyopathy (HCM)                      | 10    | 0.048      | 0.462     | 2.08            |

ovarian cancer. NT-proBNP is elevated in 4/8 EOC patients independently of cardiac failure. Dashed line = cutoff for elevated NT-proBNP (100pg/ml).

**Table 1. Differentially expressed genes in co-cultured stromal cells.** This table shows the top 20 up- and downregulated genes in INOFs and MSCs co-cultured with Hey.A8 ovarian cancer cells compared to INOFs/MSCs co-cultured with normal ovarian surface epithelial cells. Genes are ranked by pooled fold change.

**Table 2. Immunohistochemical staining of NPPB in EOC specimens.** 145 tumours were stained for NPPB. Patient characteristics can be found in Supplementary Table 2. P-values indicate the results of Fisher's Exact tests. Statistically significant associations are shown in bold.

## **SUPPLEMENTARY DATA**

**Supplementary Table 1. Cell culture media.** Details of the cell culture media used for growth of ovarian cancer cell lines and normal ovarian cells. FBS, foetal bovine serum.

**Supplementary Table 2. Patient characteristics in the tissue microarray.**

**Supplementary Table 3. Gene ontology (GO) analyses of gene differentially expressed in co-cultured stromal cells.** DAVID was used to test for enrichment of Biological Processes, Cellular Compartments and Molecular Function GO terms. Genes differentially expressed by EOC-co-cultured stromal cells were enriched for pathways involved in female pregnancy, and tended to be associated with the extracellular milieu. Statistically significant terms are shown ( $P < 0.05$ , adjusted).

**Supplementary Table 4. Gene ontology (GO) analyses of gene differentially expressed in co-cultured stromal cells.** DAVID was used to test for enrichment of KEGG pathway analysis terms. Statistically significant terms are shown ( $P < 0.05$ , unadjusted).
